# Supplementary material for: Evidence for the Effectiveness of Remdesivir (GS-5734), a Nucleoside-Analog Antiviral Drug in the Inhibition of I K(M) or I K(DR) and in the Stimulation of I MEP
Source: PubMed Central journal article supplement (PMC7385287; doi:10.3389/fphar.2020.01091), 2020-07-21
Supplement: DataSheet_1.pdf [file DataSheet_1.pdf]

## Supplementary material (1)

### *Data recordings and analyses*

The signals, consisting of potential and current traces, were stored online on an ASUS VivoBook Flip-14 touchscreen laptop computer (TP412U; Taipei, Taiwan) at 10 kHz through a Digidata 1440A interface (Molecular Devices). During the recordings, data acquisition system connected with the latter device was operated by pCLAMP 10.7 (Molecular Devices). Current signals were low-pass filtered at 3 kHz with an FL-4 four-pole Bessel filter (Dagan, Minneapolis, MN). We analyzed the signals offline by using either pCLAMP 10.7 (Molecular Devices), OriginPro (OriginLab; Scientific Formosa, Taipei, Taiwan) or different custom-made macros created from Microsoft Excel™ 2019.

To estimate the percentage inhibition of RDV on  $I_{K(DR)}$ , we bathed cells in  $Ca^{2+}$ -free, Tyrode's solution (i.e., 5.4 mM  $K^+$ -containing solution), each cell was depolarized for 1 sec from a holding potential of -50 to +50 mV, and the amplitude of  $I_{K(DR)}$  during the exposure to different RDV concentrations was compared with the control value. To determine that of RDV on  $I_{K(M)}$ , we bathed cells in high- $K^+$ ,  $Ca^{2+}$ -free solution and the examined cell was depolarized from -50 to -10 mV. We appropriately fitted the concentration-dependent effect of RDV on the inhibition of  $I_{K(DR)}$  (i.e., initial peak and sustained [late] currents) with a Hill function by using a nonlinear least-square fitting algorithm. That is,

$$\text{Percentage inhibition (\%)} = \frac{[RDV]^{n_H} \times E_{\max}}{[RDV]^{n_H} + IC_{50}^{n_H}}$$

where [RDV] is the RDV (remdesivir) concentration;  $E_{\max}$  is the RDV-induced maximal inhibition of either initial peak and sustained  $I_{K(DR)}$  or  $I_{K(M)}$ ; and  $IC_{50}$  and  $n_H$  are the concentration required for a 50% inhibition and the Hill coefficient, respectively.

The concentration-response data for RDV-induced stimulation of  $I_{MEP}$  emerging from

GH<sub>3</sub> cells were created and least-squares fitted with a modified Hill function:

$$y = \frac{[\text{RDV}]^{n_H} \times E_{\max}}{[\text{RDV}]^{n_H} + \text{EC}_{50}^{n_H}}$$

where  $y$  is the relative amplitude of  $I_{\text{MEP}}$ ,  $[\text{RDV}]$  is the RDV (remdesivir) concentration given, the  $\text{EC}_{50}$  is the concentration required for a 50% increase in the current amplitude, and  $E_{\max}$  is the maximal increase in  $I_{\text{MEP}}$  produced by 100  $\mu\text{M}$  RDV.

To determine the steady-state inactivation curve of  $I_{\text{K(DR)}}$  in the absence and presence of different RDV concentrations, we collected the results and then constructed the relationships between the normalized amplitude of  $I_{\text{K(DR)}}$  and the conditioning potentials applied. The data achieved were least-squares fitted with a Boltzmann function of the following form:

$$\frac{I}{I_{\max}} = \frac{1}{\left\{ 1 + \exp \left[ \frac{(V - V_{1/2})qF}{RT} \right] \right\}}$$

where  $I_{\max}$  is the maximal amplitude of  $I_{\text{K(DR)}}$  measured at the level of +50 mV;  $V_{1/2}$  the voltage (in mV) at which half-maximal inhibition occurs;  $q$  the apparent gating charge (in elementary charge [ $e$ ]) of the inactivation curve;  $F$  the Faraday constant;  $R$  the universal gas constant; and  $T$  the absolute temperature (in Kelvin).

#### *Kinetic study of remdesivir- (RDV)-induced block of $I_{\text{K(DR)}}$ in pituitary tumor (GH<sub>3</sub>) cells*

To provide quantitative estimate for RDV-induced block of  $I_{\text{K(DR)}}$ , we further analyzed the time-dependent trajectories for the relative block of  $I_{\text{K(DR)}}$  (i.e.,  $(I_{\text{control}} - I_{\text{RDV}})/I_{\text{control}}$ ) observed in these cells. We fitted the time courses of relative block in the presence of different RDV concentrations by a single-exponential function (**Fig. 1C and 1D**). The concentration dependence of relative block of  $I_{\text{K(DR)}}$  in response to long-lasting step

depolarization was shown in **Fig. 1C and 1D**. The results demonstrated that the exposure of cells to RDV produced a concentration-dependent raise in the rate ( $1/\tau$ ) of relative block of  $I_{K(DR)}$ .

The inhibitory action of RDV on depolarization-elicited  $I_{K(DR)}$  measured from GH<sub>3</sub> cells is satisfactorily explained by state-dependent block that preferentially binds to the open state of the channel. A minimal reaction scheme was derived as the following:

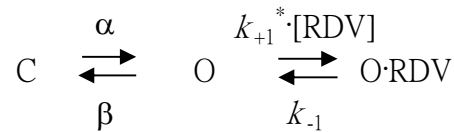

where [RDV] is the remdesivir (RDV) concentration;  $\alpha$  or  $\beta$  is the voltage-gated rate constant for the opening or closing of K<sub>v</sub> channels, respectively;  $k_{+1}^*$  or  $k_{-1}$  is the blocking (i.e., on) or unblocking (i.e., off) rate constant produced by the presence of RDV, respectively; and C, O, or O·RDV shown in the scheme represents the closed (resting), open, or open-blocked states, respectively.

The blocking (i.e., on) and unblocking (i.e., off) rate constants, namely  $k_{+1}^*$  and  $k_{-1}$ , were determined from the time constants ( $\tau$ ) of depolarization-evoked relative block ( $(I_{control} - I_{RDV})/I_{control}$ ) of  $I_{K(DR)}$  obtained in different concentrations of RDV. The rate constants ( $1/\tau$ ) obtained were allowed to be computed using the relation (**Fig. 1D**).

$$\frac{1}{\tau} = k_{+1}^* \times [RDV] + k_{-1}$$

where  $k_{+1}^*$  or  $k_{-1}$  is acquired from the slope or from the y-axis intercept at [RDV] = 0 of the linear regression in which the reciprocal time constants ( $1/\tau$ ) versus the RDV concentrations were interpolated, and [RDV] is the RDV concentration.

As a consequence, on the basis of the first-order binding scheme elaborated above, the relationship between  $1/\tau$  and [RDV] became linear with a correlation coefficient of 0.96 (**Fig.**

**1D).** The blocking or unblocking rate constants was estimated to be  $2.01 \pm 0.02 \text{ sec}^{-1} \mu\text{M}^{-1}$  or  $6.12 \pm 0.02 \text{ sec}^{-1}$  ( $n=9$ ), respectively; consequently, the results yielded the value of dissociation constant ( $K_D = k_{-1}/(k_{+1} \cdot [\text{RDZ}])$ ) of  $3.04 \mu\text{M}$ .

## Supplementary material (2)

### *Effect of RDZ on delayed-rectifier K<sup>+</sup> current ( $I_{K(DR)}$ ) identified in Jurkat T-lymphocytes*

In this separate set of experiments, Jurkat T-lymphocytes were dispersed and then bathed in Ca<sup>2+</sup>-free, Tyrode's solution and the recording pipette was filled with K<sup>+</sup>-containing solution. The Jurkat T cell line is a CD45-deficient clone derived from the E6-1 clone of Jurkat human T cell leukemic cell line, which has been demonstrated to express K<sub>v</sub>1.3-type  $I_{K(DR)}$ . As cells were exposed RDZ, the amplitude of  $I_{K(DR)}$  elicited by membrane depolarization from -50 to +50 mV with a duration of 300 msec was progressively decreased (**Supplementary Figure 1A**). The averaged current-voltage relationships of  $I_{K(DR)}$  in the absence and presence of 3 mM RDV are illustrated in **Supplementary Figure 1B**. For example, at the level of +50 mV, the addition of 3 μM RDV significantly decreased  $I_{K(DR)}$  amplitude by 46.6±2.4% from 174±28 to 93±16 pA (n=8,  $P<0.05$ ). Therefore, the addition of RDZ was effective at depressing  $I_{K(DR)}$  in combination with increased rate of current inactivation in these cells.

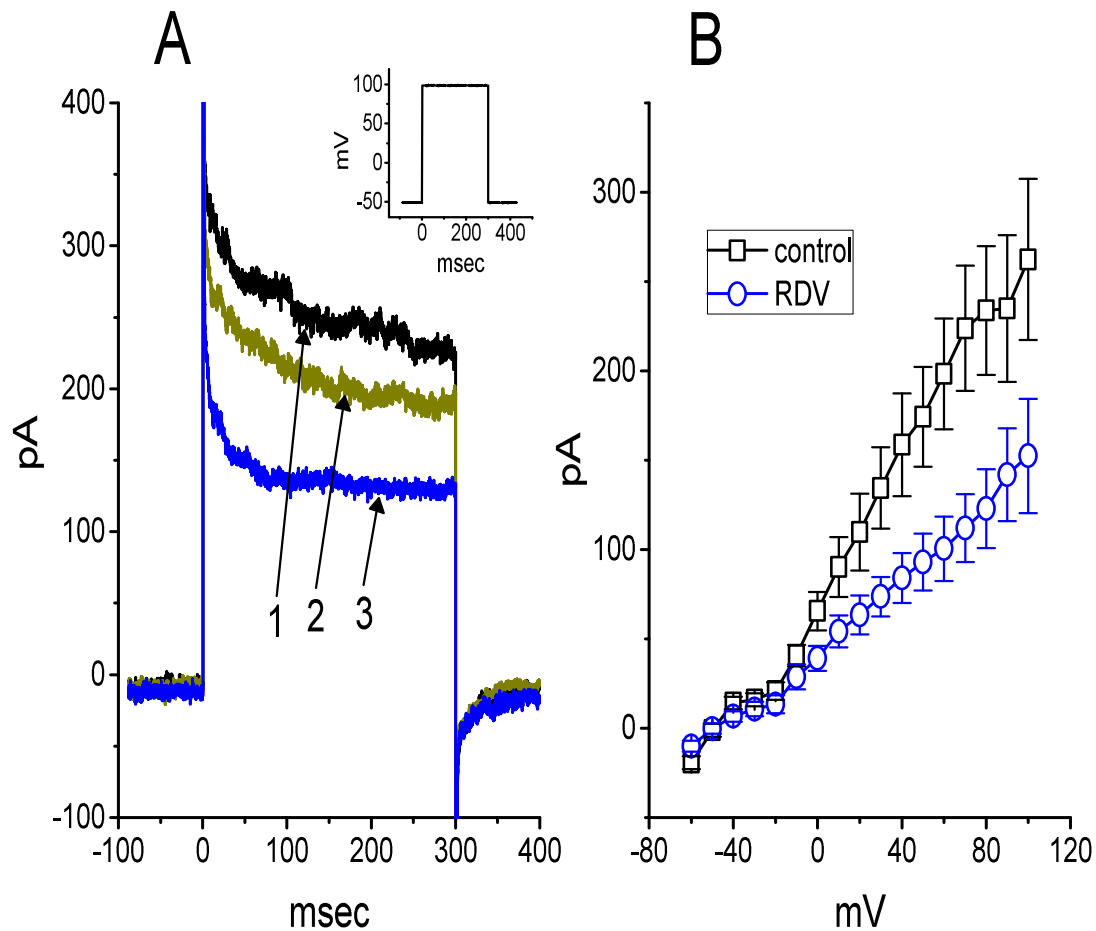

**Supplementary Figure 1.** Inhibitory effect of RDZ (3  $\mu$ M) on delayed-rectifier  $K^+$  current ( $I_{K(DR)}$ ) identified in Jurkat T-lymphocytes. **(A)** Superimposed current traces obtained in the control **(1)** and during the exposure to 1  $\mu$ M RDV **(2)** or 3  $\mu$ M RDV **(3)**. Inset indicate the voltage protocol used. **(B)** Averaged  $I$ - $V$  relationships of  $I_{K(DR)}$  in the absence ( $\square$ ) and presence ( $\circ$ ) of 3  $\mu$ M RDV (mean $\pm$ SEM;  $n=8$  for each point). Current amplitude was measured at the end of depolarizing pulse from -50 to +50 mV with a duration of 300 msec.
